# Supplementary material for: A nanofibrillated cellulose/Al(OH)3/polytetrafluoroethylene hybrid protective layer enabling dendrite free Zn anodes for rechargeable aqueous batteries
Source: Royal Society of Chemistry journal article supplement (doi:10.1039/d3ta05655d), 2024-01-01
Supplement: d3ta05655d1.pdf [file d3ta05655d1.pdf]

## Supporting Information

### Nano-fibrillated Cellulose/Al(OH)<sub>3</sub>/Polytetrafluoroethylene Hybrid Protective Layer Enabling Dendrite Free Zn Anodes for Rechargeable Aqueous Batteries

Mohammad Shayan<sup>1</sup>, Ragab Abouzeid<sup>1,2</sup>, Wangwang Xu<sup>1\*</sup>, Tongyao Wu<sup>3</sup> and Qinglin Wu<sup>1\*</sup>

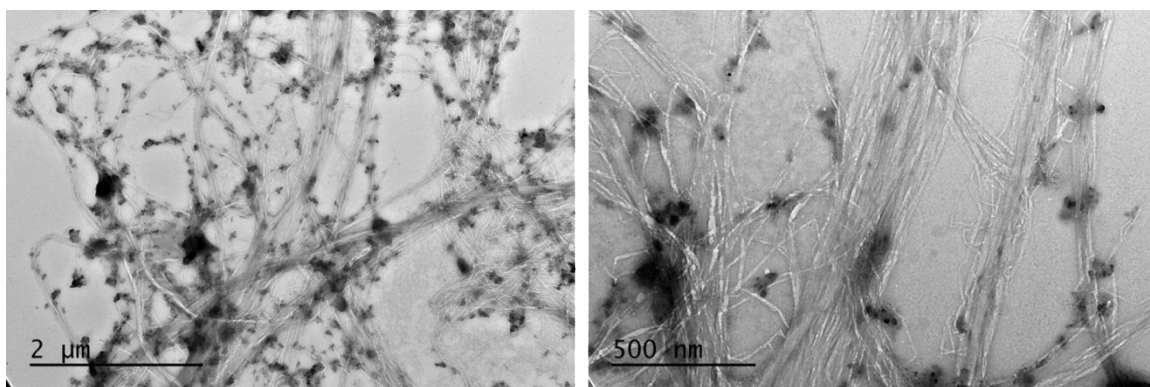

**Fig. S1.** TEM images of distributed Al(OH)<sub>3</sub> nanoparticles within NFC

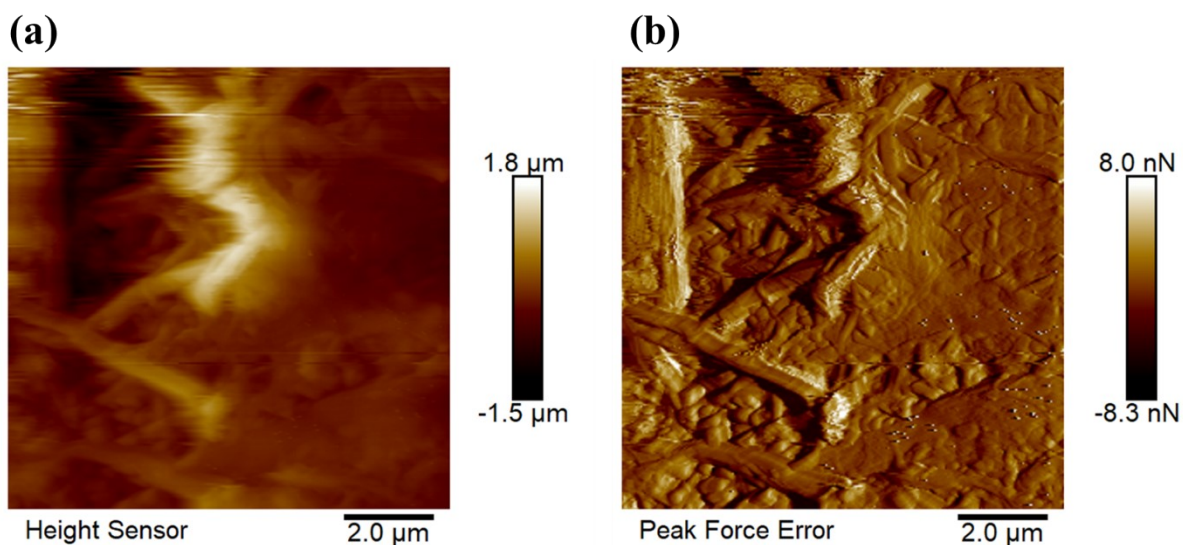

**Fig. S2.** AFM images of NFC/Al(OH)<sub>3</sub>/PTFE protective layer's surface

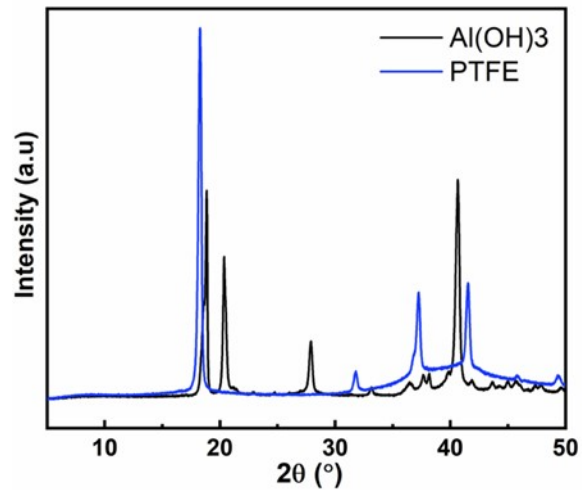

**Fig. S3.** XRD pattern of separately prepared Al(OH)<sub>3</sub> nanoparticles and PTFE

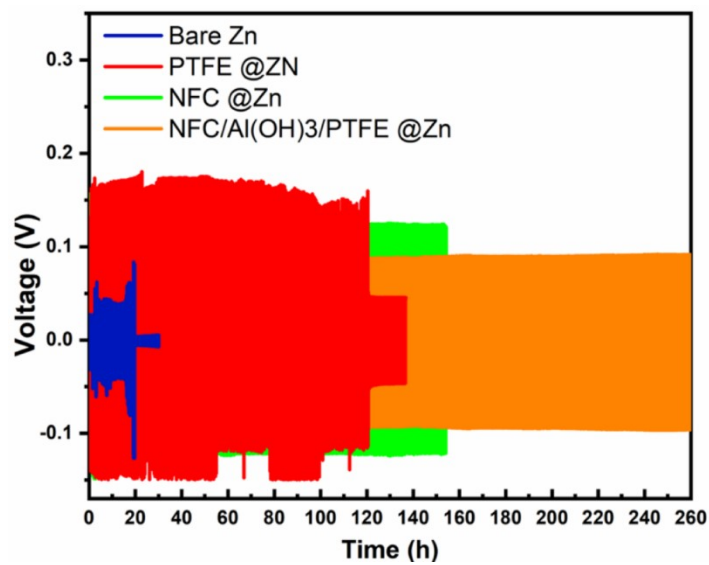

**Fig. S4.** Cycling performance of symmetric cells with bare Zn, PTFE @Zn, NFC @Zn, and NFC/Al(OH)<sub>3</sub>/PTFE @Zn at 2.5 mAcm<sup>-2</sup>

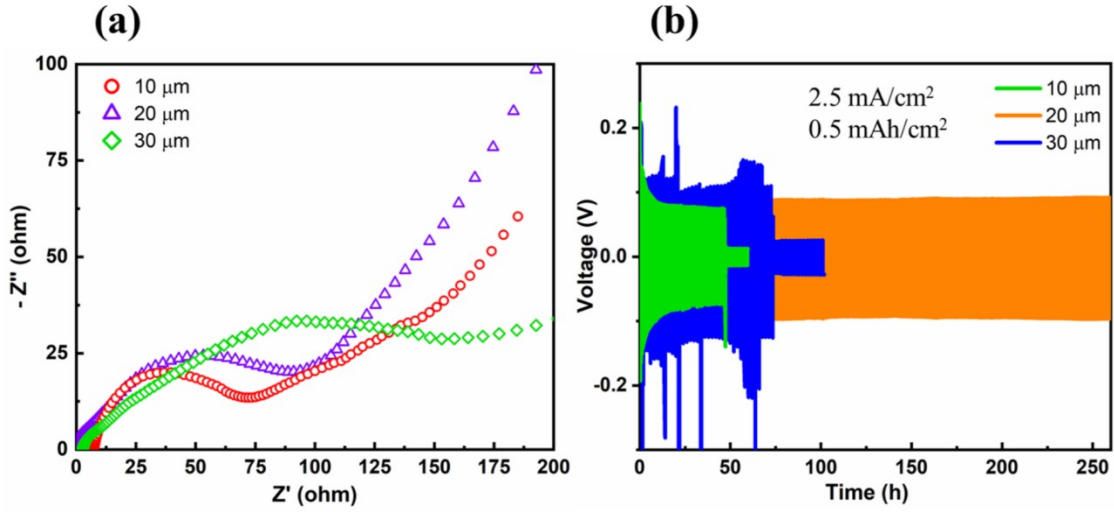

**Fig. S5.** (a) EIS spectra of symmetric batteries at different protective layer thicknesses. (b) the cycling stability of symmetric batteries at varying protective layer thicknesses with at a current density of  $2.5 \text{ mA/cm}^2$ .

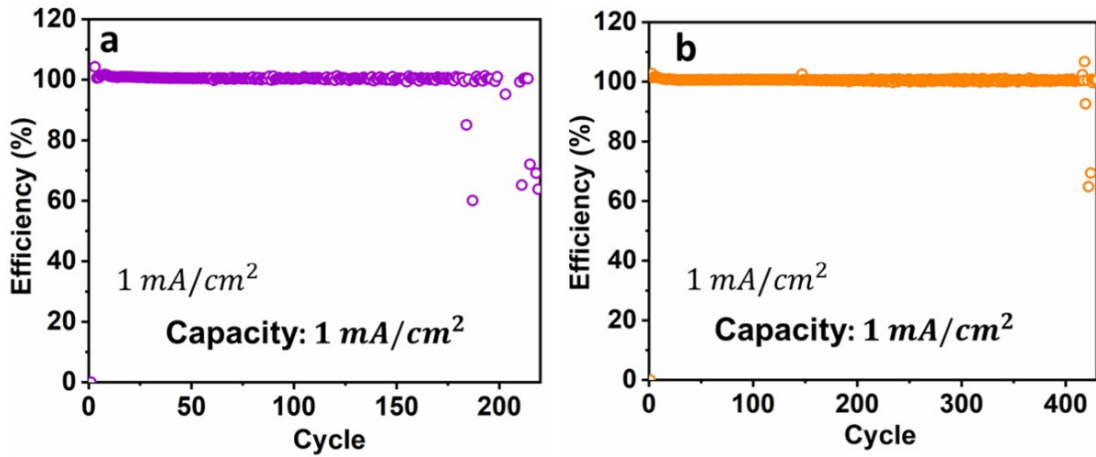

**Fig. S6.** Performance of Cu//Zn asymmetric cells tested at  $1 \text{ mA/cm}^2$ . a) coulombic efficiencies of the Cu//bare Zn asymmetric cells and b) Cu//NFC/Al(OH)<sub>3</sub>/PTFE @Zn.

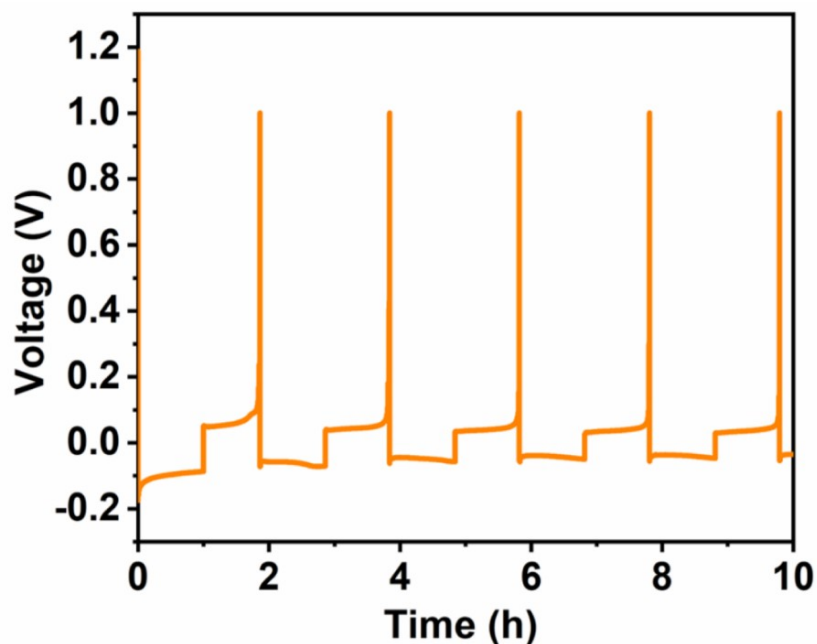

**Fig. S7.** Voltage profile of the Cu//NFC/Al(OH)<sub>3</sub>/PTFE @Zn asymmetric batteries at 1 mA/cm<sup>2</sup> for the areal specific capacity of 1 mAh/cm<sup>2</sup>.

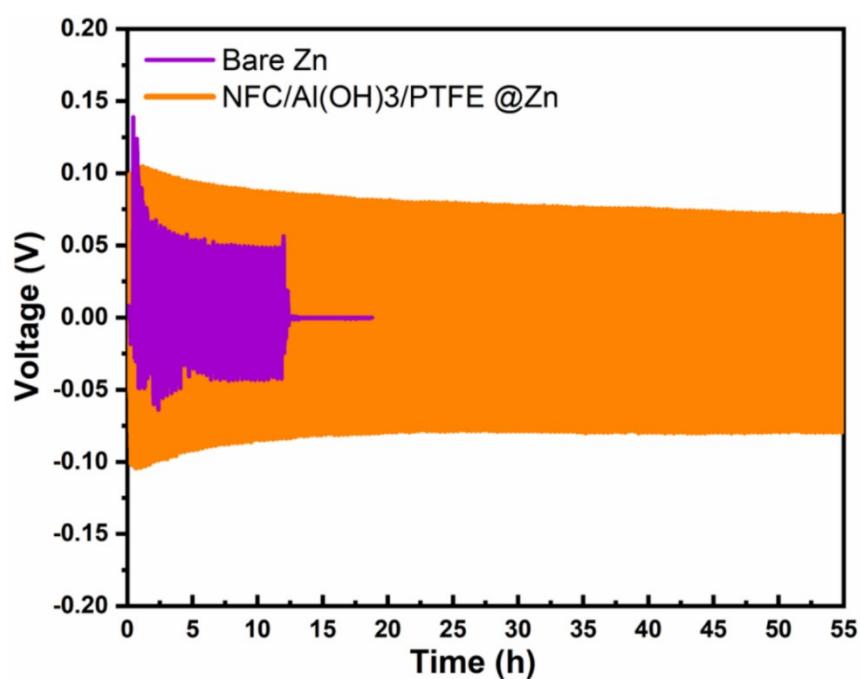

**Fig. S8.** Cycling stability of symmetric bare Zn and NFC/Al(OH)<sub>3</sub>/PTFE@Zn batteries at 50°C and a current density of 2.5 mA/cm<sup>2</sup>, 0.5 mAh/cm<sup>2</sup>.
